# Supplementary material for: Diachronic assessment of soil organic C and N dynamics under long-term no-till cropping systems in the tropical upland of Cambodia
Source: Copernicus journal article supplement (doi:10.5194/soil-10-699-2024), 2024-10-10
Supplement: Supplementary file 1 [file soil-10-699-2024-supplement.pdf]

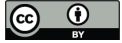

*Supplement of*

## **Diachronic assessment of soil organic C and N dynamics under long-term no-till cropping systems in the tropical upland of Cambodia**

**Vira Leng et al.**

*Correspondence to:* Vira Leng (lengvira@yahoo.com)

The copyright of individual parts of the supplement might differ from the article licence.

## List of supplementary materials

### “Diachronic assessment of long-term no-till cropping systems in the tropical upland of Cambodia”

**Table S1.** Mineral fertilizer rates applied to the main crops during the experimental period (2009-2021).

| Annual mineral<br>fertilizer rates<br>(kg ha <sup>-1</sup> ) <sup>a</sup> | Crops     | Year |      |      |      |      |      |      |      |      |      |      |      |      | Total<br>fertilizer<br>input |
|---------------------------------------------------------------------------|-----------|------|------|------|------|------|------|------|------|------|------|------|------|------|------------------------------|
|                                                                           |           | 2009 | 2010 | 2011 | 2012 | 2013 | 2014 | 2015 | 2016 | 2017 | 2018 | 2019 | 2020 | 2021 |                              |
| N in CO(NH <sub>2</sub> ) <sub>2</sub>                                    | Cassava   | 92   | 69   | 69   | 69   | 69   | 69   | 69   | 69   | 69   | 69   | 46   | 46   | 46   | 857                          |
|                                                                           | Maize     | 92   | 69   | 69   | 69   | 69   | 46   | 46   | 46   | 46   | 46   | 46   | 46   | 46   | 736                          |
|                                                                           | Rice      | 69   | 46   | 46   | 46   | 46   | 46   | 46   | 46   | 46   | 46   | 46   |      |      | 529                          |
|                                                                           | Soybean   | 23   | 23   | 23   | 23   | 23   |      |      |      |      |      |      |      |      | 115                          |
| N in (NH <sub>4</sub> ) <sub>3</sub> PO <sub>4</sub>                      | Maize     |      |      |      |      |      | 24   | 24   | 24   | 24   | 24   | 24   | 24   | 24   | 192                          |
| N in (NH <sub>4</sub> ) <sub>2</sub> HPO <sub>4</sub>                     | Soybean   |      |      |      |      |      | 18   | 18   | 18   | 18   | 18   | 18   | 18   | 18   | 144                          |
| P <sub>2</sub> O <sub>5</sub>                                             | All crops | 80   | 32   | 32   | 32   | 32   | 32   | 32   | 32   | 32   | 32   | 32   | 0    | 0    | 400                          |
| P in (NH <sub>4</sub> ) <sub>3</sub> PO <sub>4</sub>                      | Maize     |      |      |      |      |      | 30   | 30   | 30   | 30   | 30   | 30   | 30   | 30   | 240                          |
| P in (NH <sub>4</sub> ) <sub>2</sub> HPO <sub>4</sub>                     | Soybean   |      |      |      |      |      | 46   | 46   | 46   | 46   | 46   | 46   | 46   | 46   | 368                          |
| K <sub>2</sub> O                                                          | Cassava   | 60   | 90   | 60   | 60   | 60   | 60   | 60   | 60   | 60   | 60   | 60   | 60   | 60   | 810                          |
|                                                                           | Maize     | 60   | 30   | 30   | 30   | 30   | 30   | 30   | 30   | 30   | 30   | 30   | 30   | 30   | 420                          |
|                                                                           | Rice      | 60   | 30   | 30   | 30   | 30   | 30   | 30   | 30   | 30   | 30   | 30   |      |      | 360                          |
|                                                                           | Soybean   | 60   | 60   | 60   | 60   | 60   | 60   | 60   | 60   | 60   | 60   | 60   | 60   | 60   | 780                          |

<sup>a</sup> CO(NH<sub>2</sub>)<sub>2</sub>: Urea (46.0.0); (NH<sub>4</sub>)<sub>3</sub>PO<sub>4</sub>: Ammonium phosphate (16.20.0); (NH<sub>4</sub>)<sub>2</sub>HPO<sub>4</sub>: Diammonium phosphate (18-46-0); P<sub>2</sub>O<sub>5</sub>: Thermo phosphate (0.18.0); and K<sub>2</sub>O: Potassium chloride (0.0.60).

**Table S2.** Soil bulk density in 2009, 2011 and 2021.

| Experiments <sup>a</sup> | Soil depth (cm) | Sampling years and cropping systems <sup>b</sup> |      |      |      |      |      |      |      |      |  |
|--------------------------|-----------------|--------------------------------------------------|------|------|------|------|------|------|------|------|--|
|                          |                 | 2009                                             |      | 2011 |      |      |      | 2021 |      |      |  |
|                          |                 | PE                                               | CTM  | NTM  | NTR1 | NTR2 | CTM  | NTM  | NTR1 | NTR2 |  |
|                          |                 | Bulk density ( $\rho_b$ ) ( $\text{g cm}^{-3}$ ) |      |      |      |      |      |      |      |      |  |
| MaiEx                    | 0-5             | 1.11                                             | 1.17 | 1.20 | 1.20 | 1.21 | 1.14 | 1.08 | 1.10 | 1.10 |  |
|                          | 5-10            | 1.17                                             | 1.21 | 1.20 | 1.23 | 1.22 | 1.22 | 1.14 | 1.19 | 1.18 |  |
|                          | 10-20           | 1.24                                             | 1.20 | 1.20 | 1.18 | 1.22 | 1.19 | 1.15 | 1.13 | 1.19 |  |
|                          | 20-40           |                                                  | 1.07 | 1.10 | 1.13 | 1.08 | 1.01 | 0.98 | 0.98 | 1.00 |  |
|                          | 40-60           |                                                  | 1.00 | 1.05 | 1.03 | 1.09 | 0.90 | 0.90 | 0.97 | 0.94 |  |
|                          | 60-80           |                                                  | 1.11 | 1.05 | 1.09 | 1.13 | 0.92 | 0.93 | 0.99 | 0.94 |  |
|                          | 80-100          |                                                  | 1.10 | 1.08 | 1.16 | 1.15 | 0.95 | 0.95 | 1.02 | 0.96 |  |
| SoyEx                    | 0-5             | 1.15                                             | 1.16 | 1.16 | 1.16 | 1.14 | 1.09 | 1.10 | 1.16 | 1.09 |  |
|                          | 5-10            | 1.24                                             | 1.22 | 1.25 | 1.19 | 1.18 | 1.25 | 1.19 | 1.19 | 1.16 |  |
|                          | 10-20           | 1.26                                             | 1.25 | 1.23 | 1.16 | 1.22 | 1.24 | 1.16 | 1.18 | 1.14 |  |
|                          | 20-40           |                                                  | 1.11 | 1.20 | 1.11 | 1.06 | 1.09 | 1.12 | 1.06 | 1.07 |  |
|                          | 40-60           |                                                  | 1.06 | 1.07 | 1.08 | 1.04 | 0.93 | 0.95 | 0.95 | 0.95 |  |
|                          | 60-80           |                                                  | 1.07 | 1.08 | 1.09 | 1.05 | 0.93 | 0.97 | 0.94 | 0.94 |  |
|                          | 80-100          |                                                  | 1.10 | 1.07 | 1.14 | 1.13 | 0.92 | 0.96 | 0.97 | 0.93 |  |
| CasEx                    | 0-5             | 1.15                                             | 1.10 | 1.17 | 1.17 | 1.17 | 1.08 | 1.05 | 1.12 | 1.09 |  |
|                          | 5-10            | 1.20                                             | 1.11 | 1.19 | 1.18 | 1.18 | 1.20 | 1.12 | 1.21 | 1.22 |  |
|                          | 10-20           | 1.23                                             | 1.15 | 1.25 | 1.25 | 1.24 | 1.18 | 1.13 | 1.21 | 1.17 |  |
|                          | 20-40           |                                                  | 1.12 | 1.18 | 1.17 | 1.13 | 1.09 | 1.09 | 1.08 | 1.01 |  |
|                          | 40-60           |                                                  | 1.02 | 1.02 | 1.04 | 1.03 | 0.98 | 1.00 | 0.96 | 0.94 |  |
|                          | 60-80           |                                                  | 0.99 | 1.09 | 1.11 | 1.04 | 0.95 | 0.95 | 0.97 | 0.96 |  |
|                          | 80-100          |                                                  | 1.06 | 1.11 | 1.08 | 1.09 | 0.94 | 0.98 | 0.99 | 0.99 |  |

<sup>a</sup>Experiments: MaiEx = Maize-based experiment, SoyEx = Soybean-based experiment, and CasEx = Cassava-based experiment.

<sup>b</sup>Cropping systems: PE: pre-experiment (the samples were collected to 20 cm depth in 2009 prior to the establishment of the experiments); CTM: monocropping under conventional tillage; NTM: monocropping under NT systems with no-till mulch-based cropping systems associated with different crop sequences, and NTR1 and NTR2 refer to bi-annual crop rotational systems under NT systems with no-till mulch-based cropping systems associated with cropping systems as described in Table 1.

**Table S3.** Mean SOC concentration in bulk soil in 2011 and 2021.

| Experiments <sup>a</sup> | Soil depth (cm) | Cropping systems <sup>b</sup>                         |          |          |          |                                                       |          |          |          |
|--------------------------|-----------------|-------------------------------------------------------|----------|----------|----------|-------------------------------------------------------|----------|----------|----------|
|                          |                 | CTM                                                   | NTM      | NTR1     | NTR2     | CTM                                                   | NTM      | NTR1     | NTR2     |
|                          |                 | SOC concentration in 2011 (g C kg <sup>-1</sup> soil) |          |          |          | SOC concentration in 2021 (g C kg <sup>-1</sup> soil) |          |          |          |
| MaiEx                    | 0-5             | 19.68                                                 | 18.60 B  | 19.33 B  | 18.97 B  | 20.48 b                                               | 31.29 Aa | 29.23 Aa | 28.17 Aa |
|                          | 5-10            | 17.55                                                 | 16.28 B  | 16.43 B  | 16.02 B  | 19.41                                                 | 19.71 A  | 20.34 A  | 19.96 A  |
|                          | 10-20           | 14.50 B                                               | 13.90    | 13.03 B  | 13.05 B  | 16.78 A                                               | 14.87    | 15.42 A  | 14.62 A  |
|                          | 20-40           | 9.10                                                  | 8.02 B   | 7.42 B   | 8.63     | 9.44                                                  | 9.34 A   | 10.22 A  | 9.18     |
|                          | 40-60           | 6.47 a                                                | 5.45 Bb  | 6.08 b   | 5.84 b   | 6.34                                                  | 6.38     | 6.60     | 6.36     |
|                          | 60-80           | 4.87                                                  | 4.14 B   | 4.65     | 4.49     | 4.51                                                  | 5.08     | 4.89     | 4.72     |
|                          | 80-100          | 4.49 Aa                                               | 3.45 Bb  | 4.30 a   | 4.05 b   | 3.84 B                                                | 3.99     | 4.23     | 3.79     |
| SoyEx                    | 0-5             | 19.27                                                 | 19.92 B  | 20.82 B  | 20.12 B  | 19.70 b                                               | 27.45 Aa | 27.39 Aa | 28.31 Aa |
|                          | 5-10            | 18.60                                                 | 17.60    | 17.13    | 17.07    | 19.16                                                 | 17.39    | 19.83    | 19.79    |
|                          | 10-20           | 15.78                                                 | 15.65    | 14.22    | 15.47    | 16.87                                                 | 15.51    | 15.53    | 15.95    |
|                          | 20-40           | 9.71                                                  | 10.11    | 8.39     | 8.30     | 10.80 a                                               | 11.58 a  | 9.30 b   | 9.86 b   |
|                          | 40-60           | 6.44                                                  | 6.60     | 5.75     | 5.59     | 7.28                                                  | 7.61     | 6.50     | 6.49     |
|                          | 60-80           | 5.22                                                  | 5.57     | 4.42     | 4.33     | 5.39                                                  | 5.87     | 4.52     | 4.48     |
|                          | 80-100          | 4.83                                                  | 5.35     | 4.26     | 3.95     | 4.52                                                  | 4.67     | 3.54     | 3.78     |
| CasEx                    | 0-5             | 15.65 Bb                                              | 15.63 Bb | 17.98 Ba | 18.68 Ba | 17.59 Ab                                              | 19.75 Aa | 22.26 Aa | 24.32 Aa |
|                          | 5-10            | 16.42 B                                               | 15.23 B  | 16.68 B  | 16.08 B  | 17.28 A                                               | 18.26 A  | 18.36 A  | 18.06 A  |
|                          | 10-20           | 15.15 a                                               | 12.98 Bb | 14.45 ab | 13.05 Bb | 16.00                                                 | 15.47 A  | 15.18    | 14.80 A  |
|                          | 20-40           | 9.66 A                                                | 7.84 B   | 8.39 B   | 7.74 B   | 8.70 B                                                | 9.57 A   | 10.29 A  | 9.56 A   |
|                          | 40-60           | 6.68                                                  | 5.82 B   | 6.22     | 5.79 B   | 6.79                                                  | 6.88 A   | 6.68     | 6.64 A   |
|                          | 60-80           | 5.34                                                  | 4.92 B   | 5.47     | 4.98     | 5.66                                                  | 5.41 A   | 5.28     | 5.19     |
|                          | 80-100          | 5.12                                                  | 4.47     | 5.01 A   | 4.63 A   | 5.03                                                  | 4.46     | 4.41 B   | 4.03 B   |

<sup>a</sup>Experiments: MaiEx: Maize-based experiment; SoyEx: Soybean-based experiment; and CasEx: Cassava-based experiment.

<sup>b</sup>Cropping systems: CTM: monocropping under conventional tillage; NTM: monocropping under NT systems with no-till mulch-based cropping systems associated with different crop sequences, and NTR1 and NTR2 refer to bi-annual crop rotational systems under NT systems with no-till mulch-based cropping systems associated with cropping systems as described in Table 1. The different uppercase letter accompanying the values indicates a significant difference within the same treatment and depth between 2011 and 2021, while the lowercase letter(s) indicate a significant difference between the treatments within the same sampling date at the same depth at  $p < 0.05$  (Tukey's test).

**Table S4.** Mean total N concentration in bulk soil in 2011 and 2021.

| Experiments <sup>a</sup> | Soil depth (cm) | Cropping systems <sup>b</sup>                       |         |          |         |                                                     |          |          |         |
|--------------------------|-----------------|-----------------------------------------------------|---------|----------|---------|-----------------------------------------------------|----------|----------|---------|
|                          |                 | CTM                                                 | NTM     | NTR1     | NTR2    | CTM                                                 | NTM      | NTR1     | NTR2    |
|                          |                 | N concentration in 2011 (g N kg <sup>-1</sup> soil) |         |          |         | N concentration in 2021 (g N kg <sup>-1</sup> soil) |          |          |         |
| MaiEx                    | 0-5             | 1.82                                                | 1.88 B  | 1.89 B   | 1.96 B  | 1.65 b                                              | 2.70 Aa  | 2.58 Aa  | 2.49 Aa |
|                          | 5-10            | 1.64                                                | 1.66    | 1.71     | 1.79    | 1.50 b                                              | 1.71 ab  | 1.91 ab  | 1.98 a  |
|                          | 10-20           | 1.34                                                | 1.46    | 1.47     | 1.46    | 1.46                                                | 1.32     | 1.76     | 1.41    |
|                          | 20-40           | 1.13                                                | 1.08    | 1.06     | 1.15    | 0.98                                                | 0.99     | 1.08     | 1.08    |
|                          | 40-60           | 0.88 A                                              | 0.92 A  | 0.99 A   | 0.99 A  | 0.78 B                                              | 0.70 B   | 0.79 B   | 0.83 B  |
|                          | 60-80           | 0.77                                                | 0.80    | 0.87 A   | 0.88 A  | 0.66                                                | 0.86     | 0.66 B   | 0.72 B  |
|                          | 80-100          | 0.71 A                                              | 0.76    | 0.85 A   | 0.79 A  | 0.53 B                                              | 0.64     | 0.69 B   | 0.63 B  |
| SoyEx                    | 0-5             | 1.87                                                | 1.92 B  | 2.02 B   | 1.95 B  | 1.70 b                                              | 2.39 Aa  | 2.36 Aa  | 2.50 Aa |
|                          | 5-10            | 1.65                                                | 1.67    | 1.72     | 1.72    | 2.15                                                | 1.56     | 1.79     | 1.85    |
|                          | 10-20           | 1.39                                                | 1.53    | 1.47     | 1.61    | 1.51                                                | 1.42     | 1.62     | 1.48    |
|                          | 20-40           | 1.07                                                | 1.22    | 1.20     | 1.19    | 1.16                                                | 1.19     | 1.09     | 1.10    |
|                          | 40-60           | 0.95                                                | 1.01    | 0.98 A   | 0.94    | 0.89                                                | 0.93     | 0.82 B   | 0.85    |
|                          | 60-80           | 0.85                                                | 0.94 A  | 0.88     | 0.86 A  | 0.73                                                | 0.72 B   | 0.78     | 0.72 B  |
|                          | 80-100          | 0.77                                                | 0.90 A  | 0.85 A   | 0.82    | 0.79 a                                              | 0.64 Bab | 0.58 Bb  | 0.71 ab |
| CasEx                    | 0-5             | 1.57 b                                              | 1.74 ab | 1.70 Bab | 1.90 Ba | 1.58 c                                              | 1.75 cb  | 1.99 Aab | 2.18 Aa |
|                          | 5-10            | 1.69 ab                                             | 1.72 a  | 1.53 Bb  | 1.67 ab | 1.58                                                | 1.69     | 1.68 A   | 1.69    |
|                          | 10-20           | 1.52                                                | 1.54 A  | 1.37     | 1.44    | 1.47                                                | 1.29 B   | 1.45     | 1.46    |
|                          | 20-40           | 1.21 A                                              | 1.20 A  | 1.02 B   | 1.12    | 1.04 B                                              | 1.08 B   | 1.21 A   | 1.12    |
|                          | 40-60           | 1.01 ab                                             | 1.07 Aa | 0.88 b   | 0.97 ab | 0.92                                                | 0.95 B   | 0.88     | 0.94    |
|                          | 60-80           | 0.90                                                | 0.99 A  | 0.80     | 0.90    | 0.73                                                | 0.77 B   | 0.84     | 0.80    |
|                          | 80-100          | 0.83                                                | 0.92 A  | 0.80     | 0.81    | 0.76                                                | 0.69 B   | 0.68     | 0.74    |

<sup>a</sup>Experiments: MaiEx: Maize-based experiment; SoyEx: Soybean-based experiment; and CasEx: Cassava-based experiment.

<sup>b</sup>Cropping systems: CTM: monocropping under conventional tillage; NTM: monocropping under NT systems with no-till mulch-based cropping systems associated with different crop sequences, and NTR1 and NTR2 refer to bi-annual crop rotational systems under NT systems with no-till mulch-based cropping systems associated with cropping systems as described in Table 1. The different uppercase letter accompanying the values indicates a significant difference within the same treatment and depth between 2011 and 2021 (diachronic), while the lowercase letter(s) indicate a significant difference between the treatments within the same sampling date at the same depth (synchronic) at  $p < 0.05$  (Tukey's test).

**Table S5.** Mean SOC and TN stocks per soil layer in 2011.

| Experiments <sup>a</sup> | Approximate soil depth (cm) | Cropping systems                           |          |           |           | CTM                                            | NTM      | NTR1     | NTR2    |
|--------------------------|-----------------------------|--------------------------------------------|----------|-----------|-----------|------------------------------------------------|----------|----------|---------|
|                          |                             | CTM                                        | NTM      | NTR1      | NTR2      |                                                |          |          |         |
|                          |                             | SOC stock in 2011 (Mg C ha <sup>-1</sup> ) |          |           |           | Total N stock in 2011 (Mg N ha <sup>-1</sup> ) |          |          |         |
| MaiEx                    | 0-5                         | 9.45                                       | 8.93 B   | 9.28 B    | 9.10 B    | 0.87                                           | 0.90 B   | 0.91 B   | 0.94 B  |
|                          | 5-10                        | 9.29 B                                     | 8.70 B   | 8.85 B    | 8.67 B    | 0.87                                           | 0.88     | 0.91     | 0.95    |
|                          | 10-20                       | 15.99 B                                    | 15.24    | 14.58 B   | 14.46 B   | 1.48                                           | 1.58     | 1.61     | 1.62    |
|                          | 20-40                       | 18.83                                      | 17.05    | 15.81 B   | 17.92     | 2.19                                           | 2.16     | 2.12     | 2.27    |
|                          | 40-60                       | 13.00 a                                    | 11.35 ab | 11.71 bc  | 12.13 c   | 1.71 A                                         | 1.73 A   | 1.80 A   | 1.86 A  |
|                          | 60-80                       | 10.19 Aa                                   | 8.90 a   | 9.82 a    | 9.52 b    | 1.49 A                                         | 1.60     | 1.69 A   | 1.72 A  |
|                          | 80-100                      | 8.44 Aa                                    | 6.99 a   | 8.15 ab   | 7.89 b    | 1.33 A                                         | 1.41     | 1.55 A   | 1.54 A  |
|                          | 0-100                       | 85.18                                      | 77.16 B  | 78.19 B   | 79.68 B   | 9.94                                           | 10.26    | 10.58    | 10.89   |
| SoyEx                    | 0-5                         | 9.25 a                                     | 9.56 Ba  | 9.99 Ba   | 9.65 Ba   | 0.90                                           | 0.92 B   | 0.97 B   | 0.93 B  |
|                          | 5-10                        | 9.70 b                                     | 9.35 a   | 9.25 Ba   | 9.11 Bab  | 0.88                                           | 0.89     | 0.92     | 0.91    |
|                          | 10-20                       | 17.28 a                                    | 17.03 a  | 15.61 a   | 16.68 a   | 1.53 B                                         | 1.66     | 1.60     | 1.73    |
|                          | 20-40                       | 20.42 a                                    | 20.99 a  | 17.32 a   | 17.87 a   | 2.12                                           | 2.41     | 2.32     | 2.36    |
|                          | 40-60                       | 13.82 ab                                   | 14.83 a  | 11.73 b   | 11.39 b   | 1.76                                           | 1.98     | 1.88     | 1.80    |
|                          | 60-80                       | 10.76 a                                    | 11.39 a  | 9.33 a    | 8.96 a    | 1.64 A                                         | 1.80 A   | 1.69 A   | 1.63 A  |
|                          | 80-100                      | 9.21 a                                     | 9.87 a   | 7.81 a    | 7.46 a    | 1.47                                           | 1.65 A   | 1.56 A   | 1.49 A  |
|                          | 0-100                       | 90.44                                      | 93.00    | 81.05     | 81.12     | 10.29                                          | 11.29 A  | 10.93    | 10.86   |
| CasEx                    | 0-5                         | 7.51 Bb                                    | 7.50 Bb  | 8.63 Ba   | 8.97 Ba   | 0.75 b                                         | 0.84 ab  | 0.82 Bab | 0.91 Ba |
|                          | 5-10                        | 8.44 Bab                                   | 7.93 Bb  | 8.78 Ba   | 8.60 Bab  | 0.87 ab                                        | 0.89 ab  | 0.81 Bb  | 0.89 ab |
|                          | 10-20                       | 16.23 Ba                                   | 14.19 Bb | 15.74 Bab | 14.40 Bab | 1.63 ab                                        | 1.67 Aa  | 1.49 b   | 1.57 ab |
|                          | 20-40                       | 19.11                                      | 16.59 B  | 17.88 B   | 16.39 B   | 2.33 Aa                                        | 2.37 Aa  | 2.03 Bb  | 2.22 a  |
|                          | 40-60                       | 13.57                                      | 11.99    | 12.78     | 11.74     | 1.90 Aab                                       | 2.00 Aa  | 1.68 a   | 1.83 ab |
|                          | 60-80                       | 10.91                                      | 9.92     | 10.73     | 9.75      | 1.72 A                                         | 1.88 A   | 1.54     | 1.71    |
|                          | 80-100                      | 9.32                                       | 8.61     | 9.58 A    | 8.71 A    | 1.55 a                                         | 1.76 Aa  | 1.42 b   | 1.55 ab |
|                          | 0-100                       | 85.09                                      | 76.74 B  | 84.10 B   | 78.55 B   | 10.75 A                                        | 11.41 Av | 9.78     | 10.68   |

<sup>a</sup> Experiments: MaiEx = Maize-based experiment, SoyEx = Soybean-based experiment, and CasEx = Cassava-based experiment.

<sup>b</sup> Cropping systems: CTM: monocropping under conventional tillage; NTM: monocropping under NT systems with no-till mulch-based cropping systems associated with different crop sequences, and NTR1 and NTR2 refer to bi-annual crop rotational systems under NT systems with no-till mulch-based cropping systems associated with cropping systems as described in Table 1. The different uppercase letter accompanying the values indicates a significant difference within the same treatment and depth between 2011 and 2021 (diachronic), while the lowercase letter(s) indicate a significant difference between the treatments within the same sampling date at the same depth (synchronic) at  $p < 0.05$  (Tukey's test).

**Table S6.** SOC stock in POM fraction (> 53  $\mu\text{m}$ ) in 2011 and 2021.

| Experiments <sup>a</sup> | Soil depth (cm) | Cropping systems <sup>b</sup>                   |        |         |        |                                                 |         |         |         |
|--------------------------|-----------------|-------------------------------------------------|--------|---------|--------|-------------------------------------------------|---------|---------|---------|
|                          |                 | CTM                                             | NTM    | NTR1    | NTR2   | CTM                                             | NTM     | NTR1    | NTR2    |
|                          |                 | C stock in POM in 2011 (Mg C ha <sup>-1</sup> ) |        |         |        | C stock in POM in 2021 (Mg C ha <sup>-1</sup> ) |         |         |         |
| MaiEx                    | 0-5             | 0.67                                            | 0.70 B | 0.80 B  | 0.81 B | 0.85 c                                          | 2.29 Aa | 1.74 Ab | 1.83 Ab |
|                          | 5-10            | 0.52 B                                          | 0.50 B | 0.57 B  | 0.55 B | 0.72 A                                          | 0.87 A  | 0.88 A  | 0.76 A  |
|                          | 10-20           | 0.65 B                                          | 0.65   | 0.59    | 0.58   | 0.97 Aa                                         | 0.63b   | 0.72a   | 0.66 a  |
|                          | 20-40           | 0.44                                            | 0.47   | 0.39    | 0.47   | 0.57                                            | 0.43    | 0.55    | 0.44    |
|                          | 40-60           | 0.21                                            | 0.21   | 0.22    | 0.23   | 0.19                                            | 0.20    | 0.23    | 0.19    |
|                          | 60-80           | 0.14                                            | 0.15   | 0.18    | 0.13   | 0.12                                            | 0.15    | 0.14    | 0.12    |
|                          | 80-100          | 0.12                                            | 0.13   | 0.15    | 0.10   | 0.09                                            | 0.11    | 0.15    | 0.09    |
| SoyEx                    | 0-5             | 0.66                                            | 0.65 B | 0.77 B  | 0.79 B | 0.79 c                                          | 2.04 Aa | 1.59 Ab | 1.77 Ab |
|                          | 5-10            | 0.48 B                                          | 0.43 B | 0.46 B  | 0.51 B | 0.64 Ac                                         | 0.95 Aa | 0.82 Ab | 0.74 Ab |
|                          | 10-20           | 0.66 B                                          | 0.61   | 0.61 B  | 0.64   | 0.89 A                                          | 0.62    | 0.77 A  | 0.74    |
|                          | 20-40           | 0.54                                            | 0.61   | 0.42    | 0.49   | 0.59                                            | 0.62    | 0.48    | 0.45    |
|                          | 40-60           | 0.24 ab                                         | 0.38 a | 0.17 b  | 0.23 b | 0.25                                            | 0.32    | 0.23    | 0.21    |
|                          | 60-80           | 0.13 ab                                         | 0.22 a | 0.10 Bb | 0.17 b | 0.14                                            | 0.17    | 0.15 A  | 0.13    |
|                          | 80-100          | 0.11                                            | 0.11   | 0.09    | 0.16   | 0.12                                            | 0.13    | 0.09    | 0.10    |
| CasEx                    | 0-5             | 0.40                                            | 0.41   | 0.49    | 0.95   | 0.49 b                                          | 0.67 ab | 0.94 ab | 1.34 a  |
|                          | 5-10            | 0.46                                            | 0.43   | 0.57    | 0.54   | 0.46                                            | 0.48    | 0.61    | 0.62    |
|                          | 10-20           | 0.70                                            | 0.63   | 0.76    | 0.60   | 0.77                                            | 0.59    | 0.68    | 0.64    |
|                          | 20-40           | 0.47                                            | 0.42   | 0.56    | 0.38 B | 0.44                                            | 0.40    | 0.53    | 0.47 A  |
|                          | 40-60           | 0.24                                            | 0.20   | 0.25    | 0.19   | 0.21                                            | 0.20    | 0.25    | 0.22    |
|                          | 60-80           | 0.15                                            | 0.13   | 0.15    | 0.15   | 0.17                                            | 0.11    | 0.14    | 0.13    |
|                          | 80-100          | 0.14                                            | 0.11   | 0.18    | 0.16   | 0.17                                            | 0.11    | 0.12    | 0.10    |

<sup>a</sup> Experiments: MaiEx = Maize-based experiment, SoyEx = Soybean-based experiment, and CasEx = Cassava-based experiment.

<sup>b</sup> Cropping systems: CTM: monocropping under conventional tillage; NTM: monocropping under NT systems with no-till mulch-based cropping systems associated with different crop sequences, and NTR1 and NTR2 refer to bi-annual crop rotational systems under NT systems with no-till mulch-based cropping systems associated with cropping systems as described in Table 1. The different uppercase letter accompanying the values indicates a significant difference within the same treatment and depth between 2011 and 2021 (diachronic), while the lowercase letter(s) indicate a significant difference between the treatments within the same sampling date at the same depth (synchronic) at  $p < 0.05$  (Tukey's test).

**Table S7.** SOC stock in MAOM fraction (< 53 µm) in 2011 and 2021.

| Experiments <sup>a</sup> | Soil depth (cm) | Cropping systems <sup>b</sup>                    |         |         |         |                                                  |          |          |          |
|--------------------------|-----------------|--------------------------------------------------|---------|---------|---------|--------------------------------------------------|----------|----------|----------|
|                          |                 | CTM                                              | NTM     | NTR1    | NTR2    | CTM                                              | NTM      | NTR1     | NTR2     |
|                          |                 | C stock in MAOM in 2011 (Mg C ha <sup>-1</sup> ) |         |         |         | C stock in MAOM in 2021 (Mg C ha <sup>-1</sup> ) |          |          |          |
| MaiEx                    | 0-5             | 7.27                                             | 7.47 B  | 7.64 B  | 7.34 B  | 7.99 b                                           | 11.18 Aa | 10.91 Aa | 10.65 Aa |
|                          | 5-10            | 7.39 B                                           | 7.56 B  | 7.51 B  | 7.18 B  | 8.38 A                                           | 9.05 A   | 9.24 A   | 8.69 A   |
|                          | 10-20           | 12.95 B                                          | 13.53   | 12.66   | 12.33   | 15.21 A                                          | 14.37    | 14.53    | 13.82    |
|                          | 20-40           | 15.48                                            | 15.29   | 13.89 B | 15.21   | 17.09                                            | 16.40    | 17.73 A  | 16.24    |
|                          | 40-60           | 10.90                                            | 10.37   | 10.45   | 10.44   | 10.92                                            | 10.75    | 11.27    | 10.72    |
|                          | 60-80           | 8.79                                             | 8.31    | 8.90    | 8.39    | 7.96                                             | 8.28     | 8.55     | 8.24     |
|                          | 80-100          | 7.37 A                                           | 6.67    | 7.39    | 6.99    | 6.32 B                                           | 6.61     | 7.06     | 6.37     |
| SoyEx                    | 0-5             | 7.49                                             | 8.01 B  | 8.28 B  | 8.08 B  | 7.91                                             | 10.22 A  | 10.10 A  | 10.06 A  |
|                          | 5-10            | 7.94                                             | 8.04 B  | 7.87 B  | 7.74 B  | 8.36                                             | 9.01 A   | 8.93 A   | 9.77 A   |
|                          | 10-20           | 14.53 B                                          | 14.92 B | 13.59 B | 13.91 B | 15.59 A                                          | 15.65 A  | 14.78 A  | 15.26 A  |
|                          | 20-40           | 17.48                                            | 18.55   | 15.31   | 15.47   | 19.03                                            | 19.60    | 16.75    | 17.00    |
|                          | 40-60           | 11.73                                            | 13.43   | 10.53   | 10.16   | 12.67                                            | 13.71    | 11.28    | 11.37    |
|                          | 60-80           | 9.25                                             | 10.48   | 8.50    | 8.06    | 9.31                                             | 10.35    | 8.32     | 8.28     |
|                          | 80-100          | 8.83                                             | 9.02    | 7.19    | 6.72    | 7.36                                             | 8.09     | 6.18     | 6.57     |
| CasEx                    | 0-5             | 6.59 B                                           | 6.55 B  | 7.32 B  | 6.96 B  | 7.10 A                                           | 8.04 A   | 8.89 A   | 9.12 A   |
|                          | 5-10            | 7.17 B                                           | 6.87 B  | 7.62 B  | 7.12 B  | 7.63 A                                           | 8.20 A   | 8.42 A   | 8.20 A   |
|                          | 10-20           | 14.01 B                                          | 12.31 B | 13.90 B | 12.39 B | 14.76 A                                          | 14.63 A  | 14.67 A  | 14.03 A  |
|                          | 20-40           | 16.88                                            | 14.49 B | 15.94 B | 13.87 B | 16.15                                            | 16.61 A  | 18.09 A  | 16.84 A  |
|                          | 40-60           | 12.03                                            | 10.56   | 11.42   | 9.92 B  | 11.35                                            | 11.87    | 12.24    | 11.54 A  |
|                          | 60-80           | 9.67                                             | 8.81    | 9.53    | 8.34    | 9.57                                             | 9.62     | 9.49     | 9.00     |
|                          | 80-100          | 8.33                                             | 7.69    | 8.53 A  | 7.44    | 8.30                                             | 7.87     | 7.35 B   | 7.43     |

<sup>a</sup> Experiments: MaiEx = Maize-based experiment, SoyEx = Soybean-based experiment, and CasEx = Cassava-based experiment.

<sup>b</sup> Cropping systems: CTM: monocropping under conventional tillage; NTM: monocropping under NT systems with no-till mulch-based cropping systems associated with different crop sequences, and NTR1 and NTR2 refer to bi-annual crop rotational systems under NT systems with no-till mulch-based cropping systems associated with cropping systems as described in Table 1. The different uppercase letter accompanying the values indicates a significant difference within the same treatment and depth between 2011 and 2021 (diachronic), while the lowercase letter(s) indicate a significant difference between the treatments within the same sampling date at the same depth (synchronic) at  $p < 0.05$  (Tukey's test).



**Table S8.** TN stock in POM fraction (> 53  $\mu\text{m}$ ) in 2011 and 2021.

| Experiments <sup>a</sup> | Soil depth (cm) | Cropping systems <sup>b</sup>                   |           |         |          |                                                 |          |          |          |
|--------------------------|-----------------|-------------------------------------------------|-----------|---------|----------|-------------------------------------------------|----------|----------|----------|
|                          |                 | CTM                                             | NTM       | NTR1    | NTR2     | CTM                                             | NTM      | NTR1     | NTR2     |
|                          |                 | N stock in POM in 2011 (Mg N ha <sup>-1</sup> ) |           |         |          | N stock in POM in 2021 (Mg N ha <sup>-1</sup> ) |          |          |          |
| MaiEx                    | 0-5             | 0.041                                           | 0.042 B   | 0.048 B | 0.048 B  | 0.052 c                                         | 0.149 Aa | 0.116 Ab | 0.122 Ab |
|                          | 5-10            | 0.032                                           | 0.029 B   | 0.031 B | 0.033 B  | 0.041                                           | 0.053 A  | 0.054 A  | 0.048 A  |
|                          | 10-20           | 0.039                                           | 0.036     | 0.034   | 0.035    | 0.051 a                                         | 0.031 b  | 0.039 ab | 0.033 ab |
|                          | 20-40           | 0.026                                           | 0.023     | 0.026   | 0.033    | 0.028                                           | 0.018    | 0.027    | 0.022    |
|                          | 40-60           | 0.015                                           | 0.012     | 0.017   | 0.019 A  | 0.008                                           | 0.009    | 0.010    | 0.009 B  |
|                          | 60-80           | 0.014                                           | 0.012     | 0.020   | 0.011    | 0.005                                           | 0.007    | 0.006    | 0.006    |
|                          | 80-100          | 0.014                                           | 0.012     | 0.020   | 0.011 A  | 0.004                                           | 0.004    | 0.008    | 0.004 B  |
| SoyEx                    | 0-5             | 0.037                                           | 0.038 B   | 0.046 B | 0.044 B  | 0.050                                           | 0.132 A  | 0.104 A  | 0.109 A  |
|                          | 5-10            | 0.029 B                                         | 0.023 B   | 0.025 B | 0.027 B  | 0.039 A                                         | 0.057 A  | 0.049 A  | 0.040 A  |
|                          | 10-20           | 0.036 B                                         | 0.029 B   | 0.029   | 0.031    | 0.052 A                                         | 0.056 A  | 0.037    | 0.033    |
|                          | 20-40           | 0.027                                           | 0.023     | 0.020   | 0.023    | 0.023                                           | 0.033    | 0.021    | 0.017    |
|                          | 40-60           | 0.014 A                                         | 0.013     | 0.013   | 0.013    | 0.007 B                                         | 0.013    | 0.010    | 0.009    |
|                          | 60-80           | 0.011 B                                         | 0.010     | 0.010   | 0.013 A  | 0.005 B                                         | 0.007    | 0.007    | 0.006 B  |
|                          | 80-100          | 0.010                                           | 0.010     | 0.008   | 0.014 B  | 0.006                                           | 0.006    | 0.005    | 0.005 B  |
| CasEx                    | 0-5             | 0.022                                           | 0.023     | 0.029   | 0.062    | 0.026 c                                         | 0.041 ab | 0.059 ab | 0.077 a  |
|                          | 5-10            | 0.025                                           | 0.024     | 0.033   | 0.032    | 0.024                                           | 0.028    | 0.036    | 0.035    |
|                          | 10-20           | 0.036                                           | 0.034     | 0.039   | 0.030    | 0.038                                           | 0.030    | 0.036    | 0.032    |
|                          | 20-40           | 0.028 A                                         | 0.024 A   | 0.030 A | 0.022    | 0.020 B                                         | 0.017 B  | 0.022 B  | 0.022    |
|                          | 40-60           | 0.015 A                                         | 0.013 A   | 0.016   | 0.015    | 0.009 B                                         | 0.009 B  | 0.013    | 0.011    |
|                          | 60-80           | 0.009 b                                         | 0.010 Aab | 0.012 a | 0.014 Aa | 0.009                                           | 0.006 B  | 0.009    | 0.007 B  |
|                          | 80-100          | 0.009                                           | 0.009     | 0.013   | 0.018 A  | 0.011                                           | 0.006    | 0.005    | 0.005 B  |

<sup>a</sup> Experiments: MaiEx = Maize-based experiment, SoyEx = Soybean-based experiment, and CasEx = Cassava-based experiment.

<sup>b</sup> Cropping systems: CTM: monocropping under conventional tillage; NTM: monocropping under NT systems with no-till mulch-based cropping systems associated with different crop sequences, and NTR1 and NTR2 refer to bi-annual crop rotational systems under NT systems with no-till mulch-based cropping systems associated with cropping systems as described in Table 1. The different uppercase letter accompanying the values indicates a significant difference within the same treatment and depth between 2011 and 2021 (diachronic), while the lowercase letter(s) indicate a significant difference between the treatments within the same sampling date at the same depth (synchronic) at  $p < 0.05$  (Tukey's test).

**Table S9.** N stock in MAOM fraction (< 53 µm) in 2011 and 2021.

| Experiments <sup>a</sup> | Soil depth (cm) | Cropping systems <sup>b</sup>                    |         |         |          |                                                  |         |          |         |
|--------------------------|-----------------|--------------------------------------------------|---------|---------|----------|--------------------------------------------------|---------|----------|---------|
|                          |                 | CTM                                              | NTM     | NTR1    | NTR2     | CTM                                              | NTM     | NTR1     | NTR2    |
|                          |                 | N stock in MAOM in 2011 (Mg N ha <sup>-1</sup> ) |         |         |          | N stock in MAOM in 2021 (Mg N ha <sup>-1</sup> ) |         |          |         |
| MaiEx                    | 0-5             | 0.59                                             | 0.75    | 0.93    | 0.74     | 0.62 b                                           | 0.97 a  | 1.09 a   | 0.83 ab |
|                          | 5-10            | 0.64 b                                           | 0.69 b  | 0.98 Aa | 0.76 b   | 0.71                                             | 0.78    | 0.75 B   | 0.69    |
|                          | 10-20           | 1.19 b                                           | 1.30 b  | 1.83 Aa | 1.35 b   | 1.32                                             | 1.25    | 0.98 B   | 1.13    |
|                          | 20-40           | 1.67 b                                           | 1.84 b  | 2.63 Aa | 1.90 Ab  | 1.69                                             | 1.48    | 1.43 B   | 1.30 B  |
|                          | 40-60           | 1.43 A                                           | 1.43 A  | 2.24 A  | 1.59 A   | 1.11 B                                           | 1.09 B  | 0.96 B   | 0.78 B  |
|                          | 60-80           | 1.34 Ab                                          | 1.33 Ab | 2.10 Aa | 1.47 Aab | 0.76 Bb                                          | 0.94 Ba | 0.70 Bab | 0.48 Bb |
|                          | 80-100          | 1.14 Ab                                          | 1.31 Ab | 1.91 Aa | 1.25 Ab  | 0.67 B                                           | 0.68 B  | 0.60 B   | 0.41 B  |
| SoyEx                    | 0-5             | 0.69                                             | 0.75    | 0.83    | 0.79     | 0.60 b                                           | 0.85 a  | 0.84 a   | 0.80 ab |
|                          | 5-10            | 0.74 A                                           | 0.71    | 0.77    | 0.76     | 0.57 Bb                                          | 0.75 a  | 0.71 a   | 0.78 a  |
|                          | 10-20           | 1.42 A                                           | 1.33    | 1.48 A  | 1.34     | 1.06 Bb                                          | 1.41a   | 1.15 Ba  | 1.15 a  |
|                          | 20-40           | 1.93                                             | 2.18    | 2.00 A  | 1.69     | 1.47                                             | 1.79    | 1.44 B   | 1.35    |
|                          | 40-60           | 1.53 A                                           | 1.72 A  | 1.58 A  | 1.21     | 1.07 B                                           | 1.23 B  | 0.98 B   | 0.97    |
|                          | 60-80           | 1.42 A                                           | 1.35 A  | 1.43 A  | 1.06     | 0.89 B                                           | 0.90 B  | 0.70 B   | 0.75    |
|                          | 80-100          | 1.39 A                                           | 1.33 A  | 1.29 A  | 0.96 A   | 0.66 B                                           | 0.69 B  | 0.53 B   | 0.59 B  |
| CasEx                    | 0-5             | 0.64 A                                           | 0.67    | 0.69    | 0.77     | 0.51 Bb                                          | 0.60 a  | 0.68 a   | 0.71 a  |
|                          | 5-10            | 0.74 A                                           | 0.73 A  | 0.73 A  | 0.84 A   | 0.56 B                                           | 0.63 B  | 0.64 B   | 0.61 B  |
|                          | 10-20           | 1.43 A                                           | 1.33 A  | 1.37 A  | 1.53 A   | 1.13 B                                           | 1.12 B  | 1.09 B   | 1.02 B  |
|                          | 20-40           | 1.99 Aa                                          | 1.72 Ab | 1.95 Aa | 2.19 Aa  | 1.32 B                                           | 1.24 B  | 1.41 B   | 1.19 B  |
|                          | 40-60           | 1.69 Aa                                          | 1.44 Ab | 1.54 Aa | 1.84 Aa  | 0.92 Ba                                          | 0.80 Ba | 1.08 Ba  | 0.67 Bb |
|                          | 60-80           | 1.57 Aa                                          | 1.31 Ab | 1.29 Ab | 1.72 Aa  | 0.76 Ba                                          | 0.65 Ba | 0.82 Ba  | 0.51 Bb |
|                          | 80-100          | 1.38 Aab                                         | 1.15 Ab | 1.14 Ab | 1.59 Aa  | 0.68 B                                           | 0.58 B  | 0.61 B   | 0.49 B  |

<sup>a</sup> Experiments: MaiEx = Maize-based experiment, SoyEx = Soybean-based experiment, and CasEx = Cassava-based experiment.

<sup>b</sup> Cropping systems: CTM: monocropping under conventional tillage; NTM: monocropping under NT systems with no-till mulch-based cropping systems associated with different crop sequences, and NTR1 and NTR2 refer to bi-annual crop rotational systems under NT systems with no-till mulch-based cropping systems associated with cropping systems as described in Table 1. The different uppercase letter accompanying the values indicates a significant difference within the same treatment and depth between 2011 and 2021 (diachronic), while the lowercase letter(s) indicate a significant difference between the treatments within the same sampling date at the same depth (synchronic) at  $p < 0.05$  (Tukey's test).

**Table S10.** Cumulative SOC stock in 2011 and 2021.

| Experiments <sup>a</sup> | Approximate soil depth (cm) | Cropping systems <sup>b</sup>                      |          |           |          |                                                    |           |           |           |
|--------------------------|-----------------------------|----------------------------------------------------|----------|-----------|----------|----------------------------------------------------|-----------|-----------|-----------|
|                          |                             | CTM                                                | NTM      | NTR1      | NTR2     | CTM                                                | NTM       | NTR1      | NTR2      |
|                          |                             | Cumulative SOC stock 2011 (Mg C ha <sup>-1</sup> ) |          |           |          | Cumulative SOC stock 2021 (Mg C ha <sup>-1</sup> ) |           |           |           |
| MaiEx                    | 0-10                        | 18.74 B                                            | 17.63 B  | 18.12 B   | 17.77 B  | 19.98 Ab                                           | 25.93 Aa  | 25.18 Aa  | 24.40 Aa  |
|                          | 0-20                        | 34.73 B                                            | 32.87 B  | 32.71 B   | 32.23 B  | 38.26 A                                            | 42.24 A   | 42.26 A   | 40.72 A   |
|                          | 0-40                        | 53.56 B                                            | 49.92 B  | 48.51 B   | 50.15 B  | 58.16 A                                            | 60.85 A   | 62.55 A   | 59.37 A   |
|                          | 0-60                        | 66.55                                              | 61.27 B  | 60.22 B   | 62.28 B  | 70.74                                              | 73.03 A   | 75.29 A   | 71.68 A   |
|                          | 0-80                        | 76.74                                              | 70.17 B  | 70.04 B   | 71.80 B  | 79.75                                              | 82.61 A   | 84.93 A   | 81.01 A   |
|                          | 0-100                       | 85.18                                              | 77.16 B  | 78.19 B   | 79.68 B  | 86.92                                              | 90.13 A   | 92.90 A   | 88.27 A   |
| SoyEx                    | 0-10                        | 18.95                                              | 18.91 B  | 19.23 B   | 18.77 B  | 19.41b                                             | 22.91 Aab | 24.19 Aa  | 24.38 Aa  |
|                          | 0-20                        | 36.23                                              | 35.94 B  | 34.85 B   | 35.44 B  | 37.76                                              | 39.70 A   | 41.46 A   | 41.81 A   |
|                          | 0-40                        | 56.65                                              | 56.92    | 52.17 B   | 53.31 B  | 60.10                                              | 62.35     | 60.72 A   | 61.50 A   |
|                          | 0-60                        | 70.47                                              | 71.75    | 63.90 B   | 64.70 B  | 75.30                                              | 78.21     | 73.72 A   | 74.59 A   |
|                          | 0-80                        | 81.23                                              | 83.14    | 73.24 B   | 73.66 B  | 86.45                                              | 90.16     | 83.20 A   | 83.90 A   |
|                          | 0-100                       | 90.44                                              | 93.00    | 81.05     | 81.12    | 95.22                                              | 99.53     | 90.23     | 91.15     |
| CasEx                    | 0-10                        | 15.95 Bab                                          | 15.44 Bb | 17.41 Bab | 17.57 Ba | 17.41 Ac                                           | 19.00 Abc | 20.50 Aab | 21.43 Aab |
|                          | 0-20                        | 32.18 B                                            | 29.63 B  | 33.14 B   | 31.97 B  | 34.56 Ab                                           | 35.66 Aab | 37.13 Aab | 37.66 Aa  |
|                          | 0-40                        | 51.29                                              | 46.22 B  | 51.02 B   | 48.36 B  | 52.74                                              | 54.50 A   | 57.90 A   | 56.93 A   |
|                          | 0-60                        | 64.86                                              | 58.21 B  | 63.80 B   | 60.10 B  | 65.86                                              | 67.93 A   | 71.84 A   | 69.92 A   |
|                          | 0-80                        | 75.77                                              | 68.13 B  | 74.53 B   | 69.85 B  | 76.97                                              | 78.71 A   | 82.46 A   | 80.10 A   |
|                          | 0-100                       | 85.09                                              | 76.74 B  | 84.10 B   | 78.55 B  | 86.44                                              | 87.42 A   | 91.07 A   | 88.01 A   |

<sup>a</sup> Experiments: MaiEx = Maize-based experiment, SoyEx = Soybean-based experiment, and CasEx = Cassava-based experiment.

<sup>b</sup> Cropping systems: CTM: monocropping under conventional tillage; NTM: monocropping under NT systems with no-till mulch-based cropping systems associated with different crop sequences, and NTR1 and NTR2 refer to bi-annual crop rotational systems under NT systems with no-till mulch-based cropping systems associated with cropping systems as described in Table 1. The different uppercase letter accompanying the values indicates significant difference within the same treatment between 2011 and 2021 (diachronic) at the same soil depth at  $p < 0.05$  (Tukey's test). Values of cumulative SOC stock change in bold indicate changes for a given treatment and depth between 2021 and 2011 are significantly different from 0 at  $p < 0.05$  (Tukey's test).

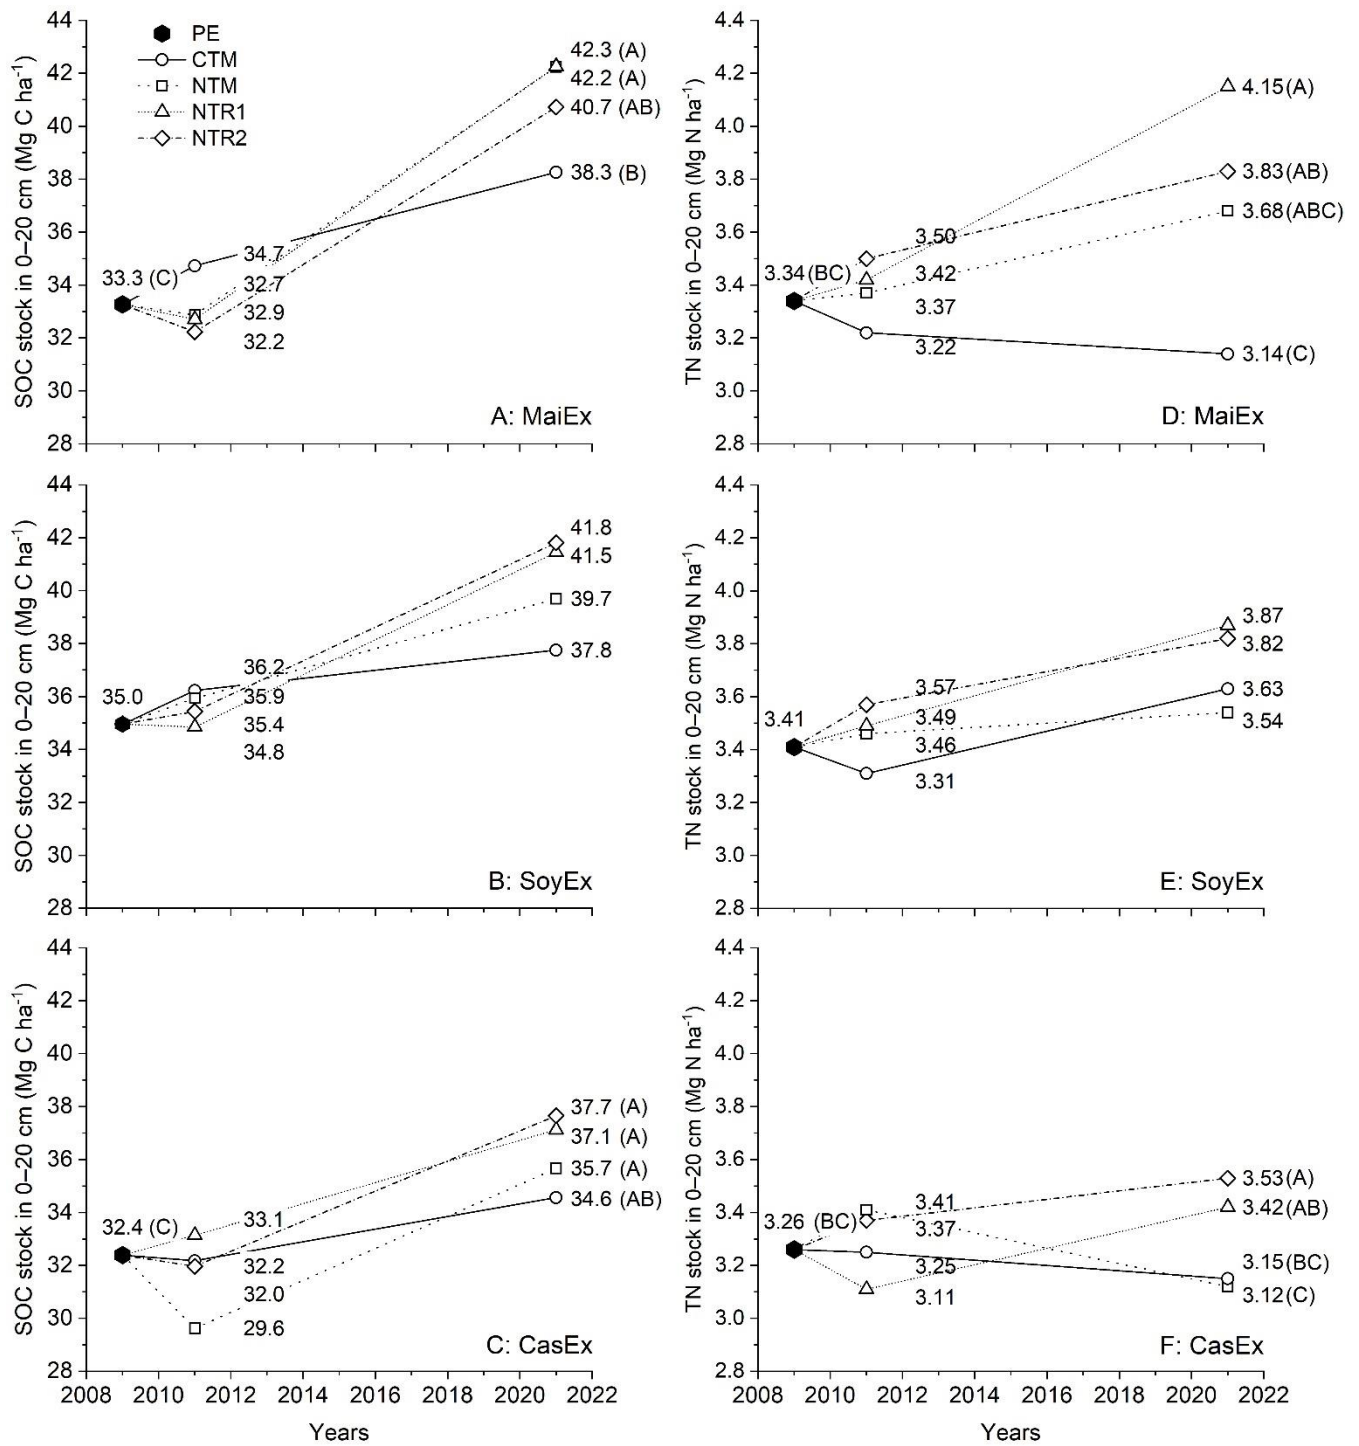

**Figure S1.** Dynamics of SOC and TN stocks (Mg ha<sup>-1</sup>) in the 0–20 cm depth from the establishment of the experiments (2009) to 2021 with pre-experiment (PE) in 2009 for comparison with different treatments in 2011

and 2021. CTM: monocropping under conventional tillage; NTM: monocropping under NT systems with no-till mulch-based cropping systems associated with different crop sequences, and NTR1 and NTR2 refer to bi-annual crop rotational systems under NT systems with no-till mulch-based cropping systems associated with cropping systems as described in Table 1. A: MaiEx – SOC stock of PE and the treatments (2011–2021) in maize-based trial; B: SoyEx – SOC stock of PE and the treatments (2011–2021) in soybean-based trial; C: CasEx – SOC stock of PE and the treatments (2011–2021) in cassava-based trial; D: MaiEx – TN stock of PE and the treatments (2011–2021) in maize-based trial; E: SoyEx – TN stock of PE and the treatments (2011–2021) in soybean-based trial; and F: CasEx – TN stock of PE and the treatments (2011–2021) in cassava-based trial. Lowercase letters inside the brackets indicate significant difference between PE and the treatment(s) in 2011 and Uppercase letters inside the brackets indicate significant difference between PE and the treatment(s) in 2021 (Tukey’s test;  $p < 0.05$ ).
